# Supplementary material for: Lowland tapir distribution and habitat loss in South America
Source: PeerJ. 2016 Sep 13;4:e2456. doi: 10.7717/peerj.2456 (PMC5028772; doi:10.7717/peerj.2456)
Supplement: Table S1 [file peerj-04-2456-s001.xlsx]

## Sheet: TABLE S1
Source	esp	long	lat
Brooks et al., 1997 - REVIEWERS - Patterson et al., 2003	Tapirus terrestris	-75.7302	6.95348
Brooks et al., 1997 - REVIEWERS - Patterson et al., 2003	Tapirus terrestris	-75.4459	8.60246
Brooks et al., 1997 - REVIEWERS - Patterson et al., 2003	Tapirus terrestris	-75.2185	9.2848
Brooks et al., 1997 - REVIEWERS - Patterson et al., 2003	Tapirus terrestris	-74.2518	10.2515
Brooks et al., 1997 - REVIEWERS - Patterson et al., 2003	Tapirus terrestris	-71.693	7.8064
Brooks et al., 1997 - REVIEWERS - Patterson et al., 2003	Tapirus terrestris	-67.0872	5.75938
Brooks et al., 1997 - REVIEWERS - Patterson et al., 2003	Tapirus terrestris	-66.8029	4.45157
Brooks et al., 1997 - REVIEWERS - Patterson et al., 2003	Tapirus terrestris	-65.8363	4.16726
Brooks et al., 1997 - REVIEWERS - Patterson et al., 2003	Tapirus terrestris	-66.4049	5.53194
Brooks et al., 1997 - REVIEWERS - Patterson et al., 2003	Tapirus terrestris	-66.8029	9.91028
Brooks et al., 1997 - REVIEWERS - Patterson et al., 2003	Tapirus terrestris	-65.4383	6.95348
Brooks et al., 1997 - REVIEWERS - Patterson et al., 2003	Tapirus terrestris	-64.8128	7.52209
Brooks et al., 1997 - REVIEWERS - Patterson et al., 2003	Tapirus terrestris	-63.2775	7.97699
Brooks et al., 1997 - REVIEWERS - Patterson et al., 2003	Tapirus terrestris	-62.3677	4.79273
Brooks et al., 1997 - REVIEWERS - Patterson et al., 2003	Tapirus terrestris	-58.7286	5.75938
Brooks et al., 1997 - REVIEWERS - Patterson et al., 2003	Tapirus terrestris	-56.2835	5.30449
Brooks et al., 1997 - REVIEWERS - Patterson et al., 2003	Tapirus terrestris	-69.3617	-4.6463
Brooks et al., 1997 - REVIEWERS - Patterson et al., 2003	Tapirus terrestris	-51.564	2.68885
Brooks et al., 1997 - REVIEWERS - Patterson et al., 2003	Tapirus terrestris	-51.6209	0.755559
Brooks et al., 1997 - REVIEWERS - Patterson et al., 2003	Tapirus terrestris	-48.8347	-2.20125
Brooks et al., 1997 - REVIEWERS - Patterson et al., 2003	Tapirus terrestris	-49.2327	-3.62279
Brooks et al., 1997 - REVIEWERS - Patterson et al., 2003	Tapirus terrestris	-57.4208	-2.42869
Brooks et al., 1997 - REVIEWERS - Patterson et al., 2003	Tapirus terrestris	-60.7756	0.584974
Brooks et al., 1997 - REVIEWERS - Patterson et al., 2003	Tapirus terrestris	-61.4579	-2.25811
Brooks et al., 1997 - REVIEWERS - Patterson et al., 2003	Tapirus terrestris	-61.4071	-20.2656
Brooks et al., 1997 - REVIEWERS - Patterson et al., 2003	Tapirus terrestris	-61.4671	-22.5456
Brooks et al., 1997 - REVIEWERS - Patterson et al., 2003	Tapirus terrestris	-60.327	-22.4256
Brooks et al., 1997 - REVIEWERS - Patterson et al., 2003	Tapirus terrestris	-59.457	-23.0856
Brooks et al., 1997 - REVIEWERS - Patterson et al., 2003	Tapirus terrestris	-56.277	-23.2356
Brooks et al., 1997 - REVIEWERS - Patterson et al., 2003	Tapirus terrestris	-55.857	-24.4356
Brooks et al., 1997 - REVIEWERS - Patterson et al., 2003	Tapirus terrestris	-54.237	-26.5357
Brooks et al., 1997 - REVIEWERS - Patterson et al., 2003	Tapirus terrestris	-55.0114	-27.2965
Brooks et al., 1997 - REVIEWERS - Patterson et al., 2003	Tapirus terrestris	-56.4678	-28.1761
Brooks et al., 1997 - REVIEWERS - Patterson et al., 2003	Tapirus terrestris	-64.8271	-23.7756
Brooks et al., 1997 - REVIEWERS - Patterson et al., 2003	Tapirus terrestris	-64.1371	-23.4456
Brooks et al., 1997 - REVIEWERS - Patterson et al., 2003	Tapirus terrestris	-64.5871	-24.4356
Brooks et al., 1997 - REVIEWERS - Patterson et al., 2003	Tapirus terrestris	-64.7671	-25.4857
Brooks et al., 1997 - REVIEWERS - Patterson et al., 2003	Tapirus terrestris	-63.7272	-11.6857
Brooks et al., 1997 - REVIEWERS - Patterson et al., 2003	Tapirus terrestris	-63.5639	-18.0527
Brooks et al., 1997 - REVIEWERS - Patterson et al., 2003	Tapirus terrestris	-63.4986	-20.9913
Brooks et al., 1997 - REVIEWERS - Patterson et al., 2003	Tapirus terrestris	-56.7398	-18.3139
Brooks et al., 1997 - REVIEWERS - Patterson et al., 2003	Tapirus terrestris	-57.3602	-16.2895
Brooks et al., 1997 - REVIEWERS - Patterson et al., 2003	Tapirus terrestris	-75.0719	-8.28309
Brooks et al., 1997 - REVIEWERS - Patterson et al., 2003	Tapirus terrestris	-72.5677	-8.61948
Brooks et al., 1997 - REVIEWERS - Patterson et al., 2003	Tapirus terrestris	-70.2503	-12.1329
Brooks et al., 1997 - REVIEWERS - Patterson et al., 2003	Tapirus terrestris	-69.4654	-12.0208
Brooks et al., 1997 - REVIEWERS - Patterson et al., 2003	Tapirus terrestris	-70.0634	-12.9552
Brooks et al., 1997 - REVIEWERS - Patterson et al., 2003	Tapirus terrestris	-63.4851	-9.4044
Brooks et al., 1997 - REVIEWERS - Patterson et al., 2003	Tapirus terrestris	-42.0524	-12.8835
Brooks et al., 1997 - REVIEWERS - Patterson et al., 2003	Tapirus terrestris	-52.3289	-16.2345
Brooks et al., 1997 - REVIEWERS - Patterson et al., 2003	Tapirus terrestris	-48.2518	-17.6866
Brooks et al., 1997 - REVIEWERS - Patterson et al., 2003	Tapirus terrestris	-41.829	-19.1946
Brooks et al., 1997 - REVIEWERS - Patterson et al., 2003	Tapirus terrestris	-40.4885	-19.0829
Brooks et al., 1997 - REVIEWERS - Patterson et al., 2003	Tapirus terrestris	-40.6561	-20.1441
Brooks et al., 1997 - REVIEWERS - Patterson et al., 2003	Tapirus terrestris	-42.1641	-20.9818
Data set from expert consultation and our own fieldwork	Tapirus terrestris	-64.0167	-24.2167
Data set from expert consultation and our own fieldwork	Tapirus terrestris	-63.95	-22.2167
Data set from expert consultation and our own fieldwork	Tapirus terrestris	-61.8224	-24.2725
Data set from expert consultation and our own fieldwork	Tapirus terrestris	-64.4911	-22.8769
Data set from expert consultation and our own fieldwork	Tapirus terrestris	-54.4615	-25.6283
Data set from expert consultation and our own fieldwork	Tapirus terrestris	-60.0025	-26.2718
Data set from expert consultation and our own fieldwork	Tapirus terrestris	-53.7813	-26.0399
Data set from expert consultation and our own fieldwork	Tapirus terrestris	-54.3131	-26.2673
Data set from expert consultation and our own fieldwork	Tapirus terrestris	-53.8833	-25.6667
Data set from expert consultation and our own fieldwork	Tapirus terrestris	-53.7218	-26.4854
Data set from expert consultation and our own fieldwork	Tapirus terrestris	-54.15	-25.8333
Anderson S. 1997	Tapirus terrestris	-65.3696	-10.8261
Anderson S. 1997	Tapirus terrestris	-64.8167	-13.25
Anderson S. 1997	Tapirus terrestris	-64.4485	-14.8327
Anderson S. 1997	Tapirus terrestris	-66.7333	-11.3167
Simonetti JA, Huareco I. 1999	Tapirus terrestris	-66.2746	-14.6546
Anderson S. 1997	Tapirus terrestris	-64.8167	-16.7167
Anderson S. 1997	Tapirus terrestris	-62.2721	-20.6073
Anderson S. 1997	Tapirus terrestris	-68.5392	-12.5334
Anderson S. 1997	Tapirus terrestris	-67.7579	-14.2564
Data set from expert consultation and our own fieldwork	Tapirus terrestris	-61.3164	1.0093
Data set from expert consultation and our own fieldwork	Tapirus terrestris	-61.0344	1.26387
Data set from expert consultation and our own fieldwork	Tapirus terrestris	-61.25	1.12058
Data set from expert consultation and our own fieldwork	Tapirus terrestris	-61.1388	0.946738
Data set from expert consultation and our own fieldwork	Tapirus terrestris	-61.2624	1.42534
Data set from expert consultation and our own fieldwork	Tapirus terrestris	-60.8495	1.42156
Data set from expert consultation and our own fieldwork	Tapirus terrestris	-60.9872	1.47663
Data set from expert consultation and our own fieldwork	Tapirus terrestris	-61.0201	-13.5799
Data set from expert consultation and our own fieldwork	Tapirus terrestris	-60.913	-14.5746
Data set from expert consultation and our own fieldwork	Tapirus terrestris	-61.2194	-14.6115
Data set from expert consultation and our own fieldwork	Tapirus terrestris	-61.31	-19.5267
Data set from expert consultation and our own fieldwork	Tapirus terrestris	-60.8103	-18.5162
Data set from expert consultation and our own fieldwork	Tapirus terrestris	-60.6205	-19.2953
Data set from expert consultation and our own fieldwork	Tapirus terrestris	-61.7887	-17.092
Data set from expert consultation and our own fieldwork	Tapirus terrestris	-40.5372	-19.9733
Data set from expert consultation and our own fieldwork	Tapirus terrestris	-40.1767	-19.0133
Data set from expert consultation and our own fieldwork	Tapirus terrestris	-40.1767	-19.0133
Data set from expert consultation and our own fieldwork	Tapirus terrestris	-40.03	-19.2
Data set from expert consultation and our own fieldwork	Tapirus terrestris	-40.0667	-19.4166
Data set from expert consultation and our own fieldwork	Tapirus terrestris	-68.9	-6.58333
Data set from expert consultation and our own fieldwork	Tapirus terrestris	-71.0167	-9.35667
Data set from expert consultation and our own fieldwork	Tapirus terrestris	-71.6639	-9.52306
Data set from expert consultation and our own fieldwork	Tapirus terrestris	-68.725	-9.25
Data set from expert consultation and our own fieldwork	Tapirus terrestris	-68.725	-9.25
Data set from expert consultation and our own fieldwork	Tapirus terrestris	-68.25	-10.0333
Data set from expert consultation and our own fieldwork	Tapirus terrestris	-73.7744	-7.45889
Data set from expert consultation and our own fieldwork	Tapirus terrestris	-72.5	-9
Data set from expert consultation and our own fieldwork	Tapirus terrestris	-68.725	-9.25
Data set from expert consultation and our own fieldwork	Tapirus terrestris	-73.7014	-7.50611
Data set from expert consultation and our own fieldwork	Tapirus terrestris	-73.2536	-8.28083
Data set from expert consultation and our own fieldwork	Tapirus terrestris	-68.25	-9.33333
Data set from expert consultation and our own fieldwork	Tapirus terrestris	-68.8603	-10.4569
Data set from expert consultation and our own fieldwork	Tapirus terrestris	-68.6275	-10.4728
Data set from expert consultation and our own fieldwork	Tapirus terrestris	-71.9	-9.38333
Data set from expert consultation and our own fieldwork	Tapirus terrestris	-73.2667	-7.38333
Data set from expert consultation and our own fieldwork	Tapirus terrestris	-64.5673	-22.6238
Data set from expert consultation and our own fieldwork	Tapirus terrestris	-64.6477	-24.6689
Data set from expert consultation and our own fieldwork	Tapirus terrestris	-61.256	-24.1471
Data set from expert consultation and our own fieldwork	Tapirus terrestris	-61.2473	-25.3994
Data set from expert consultation and our own fieldwork	Tapirus terrestris	-58.2087	-25.0227
Data set from expert consultation and our own fieldwork	Tapirus terrestris	-58.6257	3.98594
Data set from expert consultation and our own fieldwork	Tapirus terrestris	-58.5963	4.35204
Data set from expert consultation and our own fieldwork	Tapirus terrestris	-59.2062	3.53597
Data set from expert consultation and our own fieldwork	Tapirus terrestris	-59.3296	3.48003
Data set from expert consultation and our own fieldwork	Tapirus terrestris	-59.4934	3.37339
Data set from expert consultation and our own fieldwork	Tapirus terrestris	-59.2404	2.14262
Data set from expert consultation and our own fieldwork	Tapirus terrestris	-58.8966	3.82846
Data set from expert consultation and our own fieldwork	Tapirus terrestris	-59.271	4.15439
Data set from expert consultation and our own fieldwork	Tapirus terrestris	-58.9304	2.53073
Data set from expert consultation and our own fieldwork	Tapirus terrestris	-59.2927	3.06047
Data set from expert consultation and our own fieldwork	Tapirus terrestris	-54.483	-25.9
Data set from expert consultation and our own fieldwork	Tapirus terrestris	-53.983	-26.9
Data set from expert consultation and our own fieldwork	Tapirus terrestris	-54.95	-27.067
Data set from expert consultation and our own fieldwork	Tapirus terrestris	-54.133	-25.517
Data set from expert consultation and our own fieldwork	Tapirus terrestris	-64.305	-20.712
Data set from expert consultation and our own fieldwork	Tapirus terrestris	-62.567	-19.917
Data set from expert consultation and our own fieldwork	Tapirus terrestris	-62.217	-18.75
Data set from expert consultation and our own fieldwork	Tapirus terrestris	-66.733	-10.767
Data set from expert consultation and our own fieldwork	Tapirus terrestris	-66.85	-10.667
Data set from expert consultation and our own fieldwork	Tapirus terrestris	-65.525	-9.786
Data set from expert consultation and our own fieldwork	Tapirus terrestris	-65.7	-9.867
Data set from expert consultation and our own fieldwork	Tapirus terrestris	-67.25	-14.333
Data set from expert consultation and our own fieldwork	Tapirus terrestris	-65.767	-13.217
Data set from expert consultation and our own fieldwork	Tapirus terrestris	-62.31	-19.538
Data set from expert consultation and our own fieldwork	Tapirus terrestris	-58.517	-2.917
Data set from expert consultation and our own fieldwork	Tapirus terrestris	-55	-2.6
Data set from expert consultation and our own fieldwork	Tapirus terrestris	-39.805	-18.263
Data set from expert consultation and our own fieldwork	Tapirus terrestris	-40.116	-19.007
Data set from expert consultation and our own fieldwork	Tapirus terrestris	-39.977	-19.061
Data set from expert consultation and our own fieldwork	Tapirus terrestris	-44.672	-23.003
Data set from expert consultation and our own fieldwork	Tapirus terrestris	-45.367	-15.408
Data set from expert consultation and our own fieldwork	Tapirus terrestris	-45.387	-15.136
Data set from expert consultation and our own fieldwork	Tapirus terrestris	-44.999	-15.007
Data set from expert consultation and our own fieldwork	Tapirus terrestris	-45.993	-17.01
Data set from expert consultation and our own fieldwork	Tapirus terrestris	-43.354	-18.181
Data set from expert consultation and our own fieldwork	Tapirus terrestris	-42.569	-19.765
Data set from expert consultation and our own fieldwork	Tapirus terrestris	-42.544	-19.6
Data set from expert consultation and our own fieldwork	Tapirus terrestris	-43.291	-20.063
Data set from expert consultation and our own fieldwork	Tapirus terrestris	-46.883	-16.349
Data set from expert consultation and our own fieldwork	Tapirus terrestris	-45.86	-16.175
Data set from expert consultation and our own fieldwork	Tapirus terrestris	-46.398	-16.27
Data set from expert consultation and our own fieldwork	Tapirus terrestris	-42.898	-16.568
Data set from expert consultation and our own fieldwork	Tapirus terrestris	-43.907	-17.925
Data set from expert consultation and our own fieldwork	Tapirus terrestris	-42.461	-20.665
Data set from expert consultation and our own fieldwork	Tapirus terrestris	-42.659	-17.207
Data set from expert consultation and our own fieldwork	Tapirus terrestris	-46.588	-15.408
Data set from expert consultation and our own fieldwork	Tapirus terrestris	-46.297	-14.961
Data set from expert consultation and our own fieldwork	Tapirus terrestris	-46.834	-15.99
Data set from expert consultation and our own fieldwork	Tapirus terrestris	-44.465	-15.045
Data set from expert consultation and our own fieldwork	Tapirus terrestris	-44.289	-14.884
Data set from expert consultation and our own fieldwork	Tapirus terrestris	-45.577	-16.008
Data set from expert consultation and our own fieldwork	Tapirus terrestris	-46.2	-16.499
Data set from expert consultation and our own fieldwork	Tapirus terrestris	-45.045	-15.785
Data set from expert consultation and our own fieldwork	Tapirus terrestris	-45.155	-15.251
Data set from expert consultation and our own fieldwork	Tapirus terrestris	-45.869	-15.669
Data set from expert consultation and our own fieldwork	Tapirus terrestris	-45.312	-15.727
Data set from expert consultation and our own fieldwork	Tapirus terrestris	-45.265	-16.017
Data set from expert consultation and our own fieldwork	Tapirus terrestris	-44.644	-14.558
Data set from expert consultation and our own fieldwork	Tapirus terrestris	-44.8	-15.279
Data set from expert consultation and our own fieldwork	Tapirus terrestris	-44.356	-15.226
Data set from expert consultation and our own fieldwork	Tapirus terrestris	-44.2	-14.675
Data set from expert consultation and our own fieldwork	Tapirus terrestris	-44.147	-14.996
Data set from expert consultation and our own fieldwork	Tapirus terrestris	-46.258	-15.172
Data set from expert consultation and our own fieldwork	Tapirus terrestris	-45.912	-15.474
Data set from expert consultation and our own fieldwork	Tapirus terrestris	-44.98	-14.719
Data set from expert consultation and our own fieldwork	Tapirus terrestris	-44.366	-14.319
Data set from expert consultation and our own fieldwork	Tapirus terrestris	-44.649	-14.777
Data set from expert consultation and our own fieldwork	Tapirus terrestris	-43.652	-19.889
Data set from expert consultation and our own fieldwork	Tapirus terrestris	-43.44	-20.281
Data set from expert consultation and our own fieldwork	Tapirus terrestris	-43.737	-17.643
Data set from expert consultation and our own fieldwork	Tapirus terrestris	-43.706	-17.931
Data set from expert consultation and our own fieldwork	Tapirus terrestris	-43.375	-18.016
Data set from expert consultation and our own fieldwork	Tapirus terrestris	-41.029	-16.231
Data set from expert consultation and our own fieldwork	Tapirus terrestris	-41.074	-16.31
Data set from expert consultation and our own fieldwork	Tapirus terrestris	-41.127	-16.396
Data set from expert consultation and our own fieldwork	Tapirus terrestris	-44.673	-17.899
Data set from expert consultation and our own fieldwork	Tapirus terrestris	-44.66	-17.549
Data set from expert consultation and our own fieldwork	Tapirus terrestris	-49.6755	-22.4016
Data set from expert consultation and our own fieldwork	Tapirus terrestris	-51.5597	-21.1905
Data set from expert consultation and our own fieldwork	Tapirus terrestris	-49.258	-23.21
Data set from expert consultation and our own fieldwork	Tapirus terrestris	-46.9991	-24.0903
Data set from expert consultation and our own fieldwork	Tapirus terrestris	-45.533	-23.633
Data set from expert consultation and our own fieldwork	Tapirus terrestris	-46.163	-23.748
Data set from expert consultation and our own fieldwork	Tapirus terrestris	-47.45	-24.29
Data set from expert consultation and our own fieldwork	Tapirus terrestris	-48.33	-24.435
Data set from expert consultation and our own fieldwork	Tapirus terrestris	-47.9834	-24.1931
Data set from expert consultation and our own fieldwork	Tapirus terrestris	-39.269	-16.875
Data set from expert consultation and our own fieldwork	Tapirus terrestris	-39.3	-17.084
Data set from expert consultation and our own fieldwork	Tapirus terrestris	-39.167	-16.333
Data set from expert consultation and our own fieldwork	Tapirus terrestris	-48.794	-27.886
Data set from expert consultation and our own fieldwork	Tapirus terrestris	-48.346	-25.303
Data set from expert consultation and our own fieldwork	Tapirus terrestris	-48.652	-24.83
Data set from expert consultation and our own fieldwork	Tapirus terrestris	-51.252	-23.45
Data set from expert consultation and our own fieldwork	Tapirus terrestris	-52.332	-24.161
Data set from expert consultation and our own fieldwork	Tapirus terrestris	-53.919	-27.208
Data set from expert consultation and our own fieldwork	Tapirus terrestris	-56.899	-2.201
Data set from expert consultation and our own fieldwork	Tapirus terrestris	-64.219	-3.914
Data set from expert consultation and our own fieldwork	Tapirus terrestris	-62.65	-2.253
Data set from expert consultation and our own fieldwork	Tapirus terrestris	-63.363	1.506
Data set from expert consultation and our own fieldwork	Tapirus terrestris	-65.299	-4.855
Data set from expert consultation and our own fieldwork	Tapirus terrestris	-61.908	-10.145
Data set from expert consultation and our own fieldwork	Tapirus terrestris	-40.1696	-18.3687
Data set from expert consultation and our own fieldwork	Tapirus terrestris	-56.65	-18.9833
Data set from expert consultation and our own fieldwork	Tapirus terrestris	-51.7764	-17.9585
Data set from expert consultation and our own fieldwork	Tapirus terrestris	-51.628	-17.7135
Data set from expert consultation and our own fieldwork	Tapirus terrestris	-51.5428	-17.7688
Data set from expert consultation and our own fieldwork	Tapirus terrestris	-51.1652	-18.0688
Data set from expert consultation and our own fieldwork	Tapirus terrestris	-52.1749	-18.822
Data set from expert consultation and our own fieldwork	Tapirus terrestris	-52.2507	-16.6261
Data set from expert consultation and our own fieldwork	Tapirus terrestris	-50.5544	-13.2035
Data set from expert consultation and our own fieldwork	Tapirus terrestris	-52.0108	-18.4617
Data set from expert consultation and our own fieldwork	Tapirus terrestris	-57.317	-9.517
Data set from expert consultation and our own fieldwork	Tapirus terrestris	-55.133	-11.583
Data set from expert consultation and our own fieldwork	Tapirus terrestris	-53.383	-13.183
Data set from expert consultation and our own fieldwork	Tapirus terrestris	-58.483	-10.317
Data set from expert consultation and our own fieldwork	Tapirus terrestris	-59.45	-10.167
Data set from expert consultation and our own fieldwork	Tapirus terrestris	-51.117	-10.017
Data set from expert consultation and our own fieldwork	Tapirus terrestris	-48.417	-12.233
Data set from expert consultation and our own fieldwork	Tapirus terrestris	-57.567	-17.817
Data set from expert consultation and our own fieldwork	Tapirus terrestris	-54.963	-8.85059
Data set from expert consultation and our own fieldwork	Tapirus terrestris	-54.9657	-8.57975
Data set from expert consultation and our own fieldwork	Tapirus terrestris	-54.889	-9.09258
Data set from expert consultation and our own fieldwork	Tapirus terrestris	-55.0255	-8.36977
Data set from expert consultation and our own fieldwork	Tapirus terrestris	-55.4204	-6.72686
Data set from expert consultation and our own fieldwork	Tapirus terrestris	-55.661	-6.07241
Data set from expert consultation and our own fieldwork	Tapirus terrestris	-44.167	-8.833
Data set from expert consultation and our own fieldwork	Tapirus terrestris	-67.643	-8.489
Data set from expert consultation and our own fieldwork	Tapirus terrestris	-53.15	-25.433
Data set from expert consultation and our own fieldwork	Tapirus terrestris	-52.15	-22.6
Data set from expert consultation and our own fieldwork	Tapirus terrestris	-51.35	-26.4
Data set from expert consultation and our own fieldwork	Tapirus terrestris	-50.967	-23.517
Data set from expert consultation and our own fieldwork	Tapirus terrestris	-49.083	-27.05
Data set from expert consultation and our own fieldwork	Tapirus terrestris	-52.416	-21.972
Data set from expert consultation and our own fieldwork	Tapirus terrestris	-48.267	-12.483
Data set from expert consultation and our own fieldwork	Tapirus terrestris	-56.833	-20.7
Data set from expert consultation and our own fieldwork	Tapirus terrestris	-46.95	-10.5
Data set from expert consultation and our own fieldwork	Tapirus terrestris	-48.833	-26.3
Data set from expert consultation and our own fieldwork	Tapirus terrestris	-69.508	-9.609
Data set from expert consultation and our own fieldwork	Tapirus terrestris	-60.5	0.5
Data set from expert consultation and our own fieldwork	Tapirus terrestris	-51.67	-13.39
Data set from expert consultation and our own fieldwork	Tapirus terrestris	-47.7283	-14.1338
Data set from expert consultation and our own fieldwork	Tapirus terrestris	-56.11	-16.81
Data set from expert consultation and our own fieldwork	Tapirus terrestris	-56.25	-16.76
Data set from expert consultation and our own fieldwork	Tapirus terrestris	-50.75	1.383
Data set from expert consultation and our own fieldwork	Tapirus terrestris	-57.184	-15.625
Data set from expert consultation and our own fieldwork	Tapirus terrestris	-58.4243	-15.2496
Data set from expert consultation and our own fieldwork	Tapirus terrestris	-58.6262	-15.5346
Data set from expert consultation and our own fieldwork	Tapirus terrestris	-58.0188	-15.5411
Data set from expert consultation and our own fieldwork	Tapirus terrestris	-57.798	-16.287
Data set from expert consultation and our own fieldwork	Tapirus terrestris	-56.087	-13.818
Data set from expert consultation and our own fieldwork	Tapirus terrestris	-58.7332	-15.1998
Data set from expert consultation and our own fieldwork	Tapirus terrestris	-64.008	-8.875
Data set from expert consultation and our own fieldwork	Tapirus terrestris	-64.027	-8.837
Data set from expert consultation and our own fieldwork	Tapirus terrestris	-64.728	-9.334
Data set from expert consultation and our own fieldwork	Tapirus terrestris	-65.335	-9.538
Data set from expert consultation and our own fieldwork	Tapirus terrestris	-64.201	-9.035
Data set from expert consultation and our own fieldwork	Tapirus terrestris	-69.216	-9.02
Data set from expert consultation and our own fieldwork	Tapirus terrestris	-47.01	-23.435
Data set from expert consultation and our own fieldwork	Tapirus terrestris	-47.51	-23.96
Data set from expert consultation and our own fieldwork	Tapirus terrestris	-57.017	-19.567
Data set from expert consultation and our own fieldwork	Tapirus terrestris	-46.2	-2.667
Data set from expert consultation and our own fieldwork	Tapirus terrestris	-46.067	-3.117
Data set from expert consultation and our own fieldwork	Tapirus terrestris	-46.75	-3.067
Data set from expert consultation and our own fieldwork	Tapirus terrestris	-50.417	-6.167
Data set from expert consultation and our own fieldwork	Tapirus terrestris	-47.8	-2.967
Data set from expert consultation and our own fieldwork	Tapirus terrestris	-46.067	-9.083
Data set from expert consultation and our own fieldwork	Tapirus terrestris	-47.033	-7.017
Data set from expert consultation and our own fieldwork	Tapirus terrestris	-48.083	-5.2
Data set from expert consultation and our own fieldwork	Tapirus terrestris	-47.9191	-7.88091
Data set from expert consultation and our own fieldwork	Tapirus terrestris	-58.25	-9.75
Data set from expert consultation and our own fieldwork	Tapirus terrestris	-52.367	-3.65
Data set from expert consultation and our own fieldwork	Tapirus terrestris	-60.917	-11.717
Data set from expert consultation and our own fieldwork	Tapirus terrestris	-52.75	-18.3167
Data set from expert consultation and our own fieldwork	Tapirus terrestris	-74.666	-0.167
Data set from expert consultation and our own fieldwork	Tapirus terrestris	-74	2.616
Data set from expert consultation and our own fieldwork	Tapirus terrestris	-70.333	-3.2
Data set from expert consultation and our own fieldwork	Tapirus terrestris	-70.453	7.052
Data set from expert consultation and our own fieldwork	Tapirus terrestris	-67.517	5.15
Data set from expert consultation and our own fieldwork	Tapirus terrestris	-73.35	6.46
Data set from expert consultation and our own fieldwork	Tapirus terrestris	-73.14	2.55
Data set from expert consultation and our own fieldwork	Tapirus terrestris	-67.517	5.15
Data set from expert consultation and our own fieldwork	Tapirus terrestris	-73.562	2.323
Data set from expert consultation and our own fieldwork	Tapirus terrestris	-73.14	2.55
Data set from expert consultation and our own fieldwork	Tapirus terrestris	-73.403	2.55
Data set from expert consultation and our own fieldwork	Tapirus terrestris	-73.14	2.55
Data set from expert consultation and our own fieldwork	Tapirus terrestris	-68.9	5.3
Data set from expert consultation and our own fieldwork	Tapirus terrestris	-67.517	5.15
Data set from expert consultation and our own fieldwork	Tapirus terrestris	-69.933	-4.25
Data set from expert consultation and our own fieldwork	Tapirus terrestris	-70.2	4.15
Data set from expert consultation and our own fieldwork	Tapirus terrestris	-73.3	-0.5
Data set from expert consultation and our own fieldwork	Tapirus terrestris	-72.116	0.033
Data set from expert consultation and our own fieldwork	Tapirus terrestris	-72.15	-0.38
Data set from expert consultation and our own fieldwork	Tapirus terrestris	-70.266	-4.467
Data set from expert consultation and our own fieldwork	Tapirus terrestris	-70.795	7.06
Data set from expert consultation and our own fieldwork	Tapirus terrestris	-71.55	6.59
Data set from expert consultation and our own fieldwork	Tapirus terrestris	-73.04	4.4
Data set from expert consultation and our own fieldwork	Tapirus terrestris	-72.45	5.01
Data set from expert consultation and our own fieldwork	Tapirus terrestris	-71.201	0.916
Data set from expert consultation and our own fieldwork	Tapirus terrestris	-72.47	2.36
Data set from expert consultation and our own fieldwork	Tapirus terrestris	-69.252	1.23
Data set from expert consultation and our own fieldwork	Tapirus terrestris	-75.09	2.9
Data set from expert consultation and our own fieldwork	Tapirus terrestris	-72.41	-0.6166
Data set from expert consultation and our own fieldwork	Tapirus terrestris	-72.41	1.22
Data set from expert consultation and our own fieldwork	Tapirus terrestris	-67.553	3.515
Data set from expert consultation and our own fieldwork	Tapirus terrestris	-70.43	-1.25
Data set from expert consultation and our own fieldwork	Tapirus terrestris	-71.38	-0.56
Data set from expert consultation and our own fieldwork	Tapirus terrestris	-70.833	-1.333
Data set from expert consultation and our own fieldwork	Tapirus terrestris	-69.63	-0.118
Data set from expert consultation and our own fieldwork	Tapirus terrestris	-72.433	0.067
Data set from expert consultation and our own fieldwork	Tapirus terrestris	-72.41	-0.617
Data set from expert consultation and our own fieldwork	Tapirus terrestris	-69.907	-4.094
Data set from expert consultation and our own fieldwork	Tapirus terrestris	-69.896	-3.54
Data set from expert consultation and our own fieldwork	Tapirus terrestris	-72.32	0.5
Data set from expert consultation and our own fieldwork	Tapirus terrestris	-72.067	-2.184
Data set from expert consultation and our own fieldwork	Tapirus terrestris	-73.635	4.153
Data set from expert consultation and our own fieldwork	Tapirus terrestris	-68.217	2.133
Data set from expert consultation and our own fieldwork	Tapirus terrestris	-70.317	-3.8
Data set from expert consultation and our own fieldwork	Tapirus terrestris	-69.589	-1.315
Data set from expert consultation and our own fieldwork	Tapirus terrestris	-69.511	-1.595
Data set from expert consultation and our own fieldwork	Tapirus terrestris	-69.44	-1.01
Data set from expert consultation and our own fieldwork	Tapirus terrestris	-72.51	7.12
Data set from expert consultation and our own fieldwork	Tapirus terrestris	-72.03	6.08
Data set from expert consultation and our own fieldwork	Tapirus terrestris	-71.44	6.28
Data set from expert consultation and our own fieldwork	Tapirus terrestris	-73.87	2.25
Data set from expert consultation and our own fieldwork	Tapirus terrestris	-74.49	-0.09
Data set from expert consultation and our own fieldwork	Tapirus terrestris	-74.5	2.55
Data set from expert consultation and our own fieldwork	Tapirus terrestris	-74.31	3.12
Data set from expert consultation and our own fieldwork	Tapirus terrestris	-75	1.8
Data set from expert consultation and our own fieldwork	Tapirus terrestris	-72.15	-0.38
Data set from expert consultation and our own fieldwork	Tapirus terrestris	-71.44	-2.08
Data set from expert consultation and our own fieldwork	Tapirus terrestris	-69.452	6.032
Data set from expert consultation and our own fieldwork	Tapirus terrestris	-69.51	4.23
Data set from expert consultation and our own fieldwork	Tapirus terrestris	-70.25	5.3
Data set from expert consultation and our own fieldwork	Tapirus terrestris	-70.18	6.26
Data set from expert consultation and our own fieldwork	Tapirus terrestris	-72.02	5.08
Data set from expert consultation and our own fieldwork	Tapirus terrestris	-73.39	4.09
Data set from expert consultation and our own fieldwork	Tapirus terrestris	-72.542	3.044
Data set from expert consultation and our own fieldwork	Tapirus terrestris	-75.385	1.073
Data set from expert consultation and our own fieldwork	Tapirus terrestris	-72.333	2.543
Data set from expert consultation and our own fieldwork	Tapirus terrestris	-76.136	1.597
Data set from expert consultation and our own fieldwork	Tapirus terrestris	-74.606	2.816
Data set from expert consultation and our own fieldwork	Tapirus terrestris	-75.967	1.967
Data set from expert consultation and our own fieldwork	Tapirus terrestris	-76.017	2.267
Data set from expert consultation and our own fieldwork	Tapirus terrestris	-78.633	-4.283
Data set from expert consultation and our own fieldwork	Tapirus terrestris	-75.483	-0.55
Data set from expert consultation and our own fieldwork	Tapirus terrestris	-78.41	-3.07
Data set from expert consultation and our own fieldwork	Tapirus terrestris	-78.4	-2.76
Data set from expert consultation and our own fieldwork	Tapirus terrestris	-78.2	-2.45
Data set from expert consultation and our own fieldwork	Tapirus terrestris	-78.23	-3.32
Data set from expert consultation and our own fieldwork	Tapirus terrestris	-77.74	-2.86
Data set from expert consultation and our own fieldwork	Tapirus terrestris	-78.12	-2.68
Data set from expert consultation and our own fieldwork	Tapirus terrestris	-77.68	-2.31
Data set from expert consultation and our own fieldwork	Tapirus terrestris	-77.93	-1.14
Data set from expert consultation and our own fieldwork	Tapirus terrestris	-76.19	-0.35
Data set from expert consultation and our own fieldwork	Tapirus terrestris	-75.67	-0.18
Data set from expert consultation and our own fieldwork	Tapirus terrestris	-76.4	-0.08
Data set from expert consultation and our own fieldwork	Tapirus terrestris	-75.35	-0.12
Data set from expert consultation and our own fieldwork	Tapirus terrestris	-77.898	-1.351
Data set from expert consultation and our own fieldwork	Tapirus terrestris	-77.48	-1.732
Data set from expert consultation and our own fieldwork	Tapirus terrestris	-75.986	-1.617
Data set from expert consultation and our own fieldwork	Tapirus terrestris	-77.599	-1.64
Data set from expert consultation and our own fieldwork	Tapirus terrestris	-76.201	-1.63
Data set from expert consultation and our own fieldwork	Tapirus terrestris	-75.585	-1.1
Data set from expert consultation and our own fieldwork	Tapirus terrestris	-76.584	-0.463
Data set from expert consultation and our own fieldwork	Tapirus terrestris	-78.633	-4.283
Data set from expert consultation and our own fieldwork	Tapirus terrestris	-78.4	-4.017
Data set from expert consultation and our own fieldwork	Tapirus terrestris	-77.4023	0.089563
Data set from expert consultation and our own fieldwork	Tapirus terrestris	-77.165	-1.02
Data set from expert consultation and our own fieldwork	Tapirus terrestris	-76.099	-0.101
Data set from expert consultation and our own fieldwork	Tapirus terrestris	-76.633	-0.2
Data set from expert consultation and our own fieldwork	Tapirus terrestris	-78.067	-1.45
Data set from expert consultation and our own fieldwork	Tapirus terrestris	-77.45	-0.133
Data set from expert consultation and our own fieldwork	Tapirus terrestris	-75.873	-0.964
Data set from expert consultation and our own fieldwork	Tapirus terrestris	-76.411	-2.357
Data set from expert consultation and our own fieldwork	Tapirus terrestris	-77.168	-2.646
Data set from expert consultation and our own fieldwork	Tapirus terrestris	-77.26	-2.279
Data set from expert consultation and our own fieldwork	Tapirus terrestris	-77.901	-2.534
Data set from expert consultation and our own fieldwork	Tapirus terrestris	-76.443	-2.647
Data set from expert consultation and our own fieldwork	Tapirus terrestris	-75.401	-0.975
Data set from expert consultation and our own fieldwork	Tapirus terrestris	-76.789	-0.507
Data set from expert consultation and our own fieldwork	Tapirus terrestris	-77.567	-0.717
Data set from expert consultation and our own fieldwork	Tapirus terrestris	-60	-20
Data set from expert consultation and our own fieldwork	Tapirus terrestris	-55.724	-26.452
Data set from expert consultation and our own fieldwork	Tapirus terrestris	-54.302	-24.032
Data set from expert consultation and our own fieldwork	Tapirus terrestris	-54.448	-24.785
Data set from expert consultation and our own fieldwork	Tapirus terrestris	-54.678	-25.064
Data set from expert consultation and our own fieldwork	Tapirus terrestris	-57.439	-22.667
Data set from expert consultation and our own fieldwork	Tapirus terrestris	-57.476	-22.402
Data set from expert consultation and our own fieldwork	Tapirus terrestris	-57.17	-22.32
Data set from expert consultation and our own fieldwork	Tapirus terrestris	-56.5	-22.167
Data set from expert consultation and our own fieldwork	Tapirus terrestris	-57.439	-22.667
Data set from expert consultation and our own fieldwork	Tapirus terrestris	-56.295	-23.814
Data set from expert consultation and our own fieldwork	Tapirus terrestris	-56.44	-23.56
Data set from expert consultation and our own fieldwork	Tapirus terrestris	-57	-23.6
Data set from expert consultation and our own fieldwork	Tapirus terrestris	-55.38	-24.12
Data set from expert consultation and our own fieldwork	Tapirus terrestris	-56.17	-25.24
Data set from expert consultation and our own fieldwork	Tapirus terrestris	-57.43	-23.57
Data set from expert consultation and our own fieldwork	Tapirus terrestris	-56	-23.59
Data set from expert consultation and our own fieldwork	Tapirus terrestris	-55.38	-23.6
Data set from expert consultation and our own fieldwork	Tapirus terrestris	-58.05	-23.61
Data set from expert consultation and our own fieldwork	Tapirus terrestris	-55.17	-23.63
Data set from expert consultation and our own fieldwork	Tapirus terrestris	-54.7	-23.65
Data set from expert consultation and our own fieldwork	Tapirus terrestris	-54.37	-23.66
Data set from expert consultation and our own fieldwork	Tapirus terrestris	-55.48	-23.69
Data set from expert consultation and our own fieldwork	Tapirus terrestris	-61.62	-23.17
Data set from expert consultation and our own fieldwork	Tapirus terrestris	-61.83	-22.67
Data set from expert consultation and our own fieldwork	Tapirus terrestris	-60.12	-23.75
Data set from expert consultation and our own fieldwork	Tapirus terrestris	-60.61	-22.7
Data set from expert consultation and our own fieldwork	Tapirus terrestris	-59.35	-22.57
Data set from expert consultation and our own fieldwork	Tapirus terrestris	-59.676	-22.54
Data set from expert consultation and our own fieldwork	Tapirus terrestris	-58.782	-19.78
Data set from expert consultation and our own fieldwork	Tapirus terrestris	-58.699	-19.588
Data set from expert consultation and our own fieldwork	Tapirus terrestris	-59.38	-19.792
Data set from expert consultation and our own fieldwork	Tapirus terrestris	-58.88	-21.07
Data set from expert consultation and our own fieldwork	Tapirus terrestris	-58.79	-21.111
Data set from expert consultation and our own fieldwork	Tapirus terrestris	-59.045	-22.627
Data set from expert consultation and our own fieldwork	Tapirus terrestris	-61.919	-20.116
Data set from expert consultation and our own fieldwork	Tapirus terrestris	-61.624	-23.171
Data set from expert consultation and our own fieldwork	Tapirus terrestris	-60.35	-23.08
Data set from expert consultation and our own fieldwork	Tapirus terrestris	-60.033	-22.35
Data set from expert consultation and our own fieldwork	Tapirus terrestris	-61.667	-21.25
Data set from expert consultation and our own fieldwork	Tapirus terrestris	-60.033	-21.667
Data set from expert consultation and our own fieldwork	Tapirus terrestris	-59.855	-21.438
Data set from expert consultation and our own fieldwork	Tapirus terrestris	-59.833	-22.083
Data set from expert consultation and our own fieldwork	Tapirus terrestris	-60.098	-22.054
Data set from expert consultation and our own fieldwork	Tapirus terrestris	-60.389	-21.608
Data set from expert consultation and our own fieldwork	Tapirus terrestris	-60.5	-21.133
Data set from expert consultation and our own fieldwork	Tapirus terrestris	-58.583	-19.917
Data set from expert consultation and our own fieldwork	Tapirus terrestris	-58.469	-20.09
Data set from expert consultation and our own fieldwork	Tapirus terrestris	-58.598	-24.667
Data set from expert consultation and our own fieldwork	Tapirus terrestris	-59.183	-23.183
Data set from expert consultation and our own fieldwork	Tapirus terrestris	-60.29	-20.56
Data set from expert consultation and our own fieldwork	Tapirus terrestris	-69.683	-13.503
Data set from expert consultation and our own fieldwork	Tapirus terrestris	-69.607	-13.142
Data set from expert consultation and our own fieldwork	Tapirus terrestris	-69.295	-12.838
Data set from expert consultation and our own fieldwork	Tapirus terrestris	-69.083	-13
Data set from expert consultation and our own fieldwork	Tapirus terrestris	-68.7	-12.517
Data set from expert consultation and our own fieldwork	Tapirus terrestris	-68.827	-12.807
Data set from expert consultation and our own fieldwork	Tapirus terrestris	-73.341	-11.78
Data set from expert consultation and our own fieldwork	Tapirus terrestris	-70.583	-13.25
Data set from expert consultation and our own fieldwork	Tapirus terrestris	-71.783	-4.45
Data set from expert consultation and our own fieldwork	Tapirus terrestris	-77.333	-4
Data set from expert consultation and our own fieldwork	Tapirus terrestris	-77.35	-3.7
Data set from expert consultation and our own fieldwork	Tapirus terrestris	-71.217	-10.133
Data set from expert consultation and our own fieldwork	Tapirus terrestris	-78.222	-4.57
Data set from expert consultation and our own fieldwork	Tapirus terrestris	-69.417	-13.017
Data set from expert consultation and our own fieldwork	Tapirus terrestris	-54.589	4.82
Data set from expert consultation and our own fieldwork	Tapirus terrestris	-54.738	4.27
Data set from expert consultation and our own fieldwork	Tapirus terrestris	-56.5	3.75
Data set from expert consultation and our own fieldwork	Tapirus terrestris	-63.886	6.13
Data set from expert consultation and our own fieldwork	Tapirus terrestris	-66.3	2.6
Data set from expert consultation and our own fieldwork	Tapirus terrestris	-65.2	2.5
Data set from expert consultation and our own fieldwork	Tapirus terrestris	-65.8	3.6
Data set from expert consultation and our own fieldwork	Tapirus terrestris	-61.4	4.5
Data set from expert consultation and our own fieldwork	Tapirus terrestris	-67.7	5.4
Data set from expert consultation and our own fieldwork	Tapirus terrestris	-63.5	6.8
Data set from expert consultation and our own fieldwork	Tapirus terrestris	-62.4	7.2
Data set from expert consultation and our own fieldwork	Tapirus terrestris	-61.4717	3.33035
Data set from expert consultation and our own fieldwork	Tapirus terrestris	-61.7734	3.42396
Data set from expert consultation and our own fieldwork	Tapirus terrestris	-61.5757	3.45516
Data set from expert consultation and our own fieldwork	Tapirus terrestris	-61.8818	3.23047
Data set from expert consultation and our own fieldwork	Tapirus terrestris	-64.1961	4.61524
Data set from expert consultation and our own fieldwork	Tapirus terrestris	-61.6288	-25.0031
Data set from expert consultation and our own fieldwork	Tapirus terrestris	-64.3918	-24.1142
Data set from expert consultation and our own fieldwork	Tapirus terrestris	-58.4807	-25.6342
Data set from expert consultation and our own fieldwork	Tapirus terrestris	-56.0284	-16.7104
Data set from expert consultation and our own fieldwork	Tapirus terrestris	-56.3707	-16.8373
Data set from expert consultation and our own fieldwork	Tapirus terrestris	-56.2303	-16.9188
Data set from expert consultation and our own fieldwork	Tapirus terrestris	-55.9451	-16.7128
Data set from expert consultation and our own fieldwork	Tapirus terrestris	-48.0048	-15.6911
Data set from expert consultation and our own fieldwork	Tapirus terrestris	-56.2311	-19.5541
Data set from expert consultation and our own fieldwork	Tapirus terrestris	-49.5203	-26.6499
Data set from expert consultation and our own fieldwork	Tapirus terrestris	-48.1533	-14.1365
Data set from expert consultation and our own fieldwork	Tapirus terrestris	-63.0547	-2.54462
Data set from expert consultation and our own fieldwork	Tapirus terrestris	-59.8541	-2.54729
Data set from expert consultation and our own fieldwork	Tapirus terrestris	-59.2567	-1.80691
Data set from expert consultation and our own fieldwork	Tapirus terrestris	-54.7172	-9.05648
Data set from expert consultation and our own fieldwork	Tapirus terrestris	-54.5737	-8.68928
Data set from expert consultation and our own fieldwork	Tapirus terrestris	-54.5238	-9.01349
Data set from expert consultation and our own fieldwork	Tapirus terrestris	-76.0473	7.92704
Data set from expert consultation and our own fieldwork	Tapirus terrestris	-75.8662	7.55763
Data set from expert consultation and our own fieldwork	Tapirus terrestris	-75.9465	7.48074
Data set from expert consultation and our own fieldwork	Tapirus terrestris	-76.0926	7.75381
Data set from expert consultation and our own fieldwork	Tapirus terrestris	-76.1619	7.63859
Florez FK, Rueda CF, Pe±alosa W, et al. 2008	Tapirus terrestris	-74.5625	7.04953
