# Supplementary material for: Lowland tapir distribution and habitat loss in South America
Source: PeerJ. 2016 Sep 13;4:e2456. doi: 10.7717/peerj.2456 (PMC5028772; doi:10.7717/peerj.2456)
Supplement: Table S2 [file peerj-04-2456-s002.xlsx]

## Sheet: TABLE S2
Source	esp	long	lat
Brooks et al., 1997 - REVIEWERS - Patterson et al., 2003	Tapirus terrestris	-66.2343	4.8496
Brooks et al., 1997 - REVIEWERS - Patterson et al., 2003	Tapirus terrestris	-59.5815	5.98683
Brooks et al., 1997 - REVIEWERS - Patterson et al., 2003	Tapirus terrestris	-55.4875	5.30449
Brooks et al., 1997 - REVIEWERS - Patterson et al., 2003	Tapirus terrestris	-77.7772	-2.37183
Brooks et al., 1997 - REVIEWERS - Patterson et al., 2003	Tapirus terrestris	-61.5871	-21.0756
Brooks et al., 1997 - REVIEWERS - Patterson et al., 2003	Tapirus terrestris	-60.147	-23.5956
Brooks et al., 1997 - REVIEWERS - Patterson et al., 2003	Tapirus terrestris	-62.4211	-19.9791
Brooks et al., 1997 - REVIEWERS - Patterson et al., 2003	Tapirus terrestris	-58.64	-10.3143
Data set from expert consultation and our own fieldwork	Tapirus terrestris	-53.9667	-26.4667
Data set from expert consultation and our own fieldwork	Tapirus terrestris	-53.921	-27.13
Data set from expert consultation and our own fieldwork	Tapirus terrestris	-54.833	-27.1251
Data set from expert consultation and our own fieldwork	Tapirus terrestris	-61.2257	1.55313
Data set from expert consultation and our own fieldwork	Tapirus terrestris	-61.2217	1.25743
Data set from expert consultation and our own fieldwork	Tapirus terrestris	-60.9523	1.17094
Data set from expert consultation and our own fieldwork	Tapirus terrestris	-61.0377	-14.7538
Data set from expert consultation and our own fieldwork	Tapirus terrestris	-40.1456	-18.3333
Data set from expert consultation and our own fieldwork	Tapirus terrestris	-39.8133	-18.2867
Data set from expert consultation and our own fieldwork	Tapirus terrestris	-41.8	-20.3667
Data set from expert consultation and our own fieldwork	Tapirus terrestris	-73.6611	-7.43167
Data set from expert consultation and our own fieldwork	Tapirus terrestris	-49.5497	-22.2903
Data set from expert consultation and our own fieldwork	Tapirus terrestris	-64.8196	-23.7476
Data set from expert consultation and our own fieldwork	Tapirus terrestris	-59.0347	3.75036
Data set from expert consultation and our own fieldwork	Tapirus terrestris	-58.7826	3.77037
Data set from expert consultation and our own fieldwork	Tapirus terrestris	-59.0639	2.4186
Data set from expert consultation and our own fieldwork	Tapirus terrestris	-54.363	-25.672
Data set from expert consultation and our own fieldwork	Tapirus terrestris	-54.093	-25.945
Data set from expert consultation and our own fieldwork	Tapirus terrestris	-67.6	-14.35
Data set from expert consultation and our own fieldwork	Tapirus terrestris	-41.8	-20.367
Data set from expert consultation and our own fieldwork	Tapirus terrestris	-40.083	-19.05
Data set from expert consultation and our own fieldwork	Tapirus terrestris	-44.646	-15.007
Data set from expert consultation and our own fieldwork	Tapirus terrestris	-43.764	-17.781
Data set from expert consultation and our own fieldwork	Tapirus terrestris	-44.008	-14.869
Data set from expert consultation and our own fieldwork	Tapirus terrestris	-45.464	-15.591
Data set from expert consultation and our own fieldwork	Tapirus terrestris	-47.123	-16.073
Data set from expert consultation and our own fieldwork	Tapirus terrestris	-46.142	-15.871
Data set from expert consultation and our own fieldwork	Tapirus terrestris	-44.94	-15.5
Data set from expert consultation and our own fieldwork	Tapirus terrestris	-45.37	-14.932
Data set from expert consultation and our own fieldwork	Tapirus terrestris	-43.398	-19.983
Data set from expert consultation and our own fieldwork	Tapirus terrestris	-43.346	-20.251
Data set from expert consultation and our own fieldwork	Tapirus terrestris	-42.56	-19.689
Data set from expert consultation and our own fieldwork	Tapirus terrestris	-43.549	-17.895
Data set from expert consultation and our own fieldwork	Tapirus terrestris	-41.124	-16.24
Data set from expert consultation and our own fieldwork	Tapirus terrestris	-40.981	-16.347
Data set from expert consultation and our own fieldwork	Tapirus terrestris	-52.2737	-22.5477
Data set from expert consultation and our own fieldwork	Tapirus terrestris	-47.683	-23.933
Data set from expert consultation and our own fieldwork	Tapirus terrestris	-39.279	-16.495
Data set from expert consultation and our own fieldwork	Tapirus terrestris	-48.563	-26.309
Data set from expert consultation and our own fieldwork	Tapirus terrestris	-53.888	-25.403
Data set from expert consultation and our own fieldwork	Tapirus terrestris	-60.75	-11.633
Data set from expert consultation and our own fieldwork	Tapirus terrestris	-40.019	-19.0962
Data set from expert consultation and our own fieldwork	Tapirus terrestris	-51.6951	-17.98
Data set from expert consultation and our own fieldwork	Tapirus terrestris	-51.2077	-18.0615
Data set from expert consultation and our own fieldwork	Tapirus terrestris	-52.258	-16.5998
Data set from expert consultation and our own fieldwork	Tapirus terrestris	-52.1734	-16.6108
Data set from expert consultation and our own fieldwork	Tapirus terrestris	-54.9826	-8.95308
Data set from expert consultation and our own fieldwork	Tapirus terrestris	-54.8863	-9.08969
Data set from expert consultation and our own fieldwork	Tapirus terrestris	-55.5962	-6.16416
Data set from expert consultation and our own fieldwork	Tapirus terrestris	-51	-14.383
Data set from expert consultation and our own fieldwork	Tapirus terrestris	-48.324	-13.891
Data set from expert consultation and our own fieldwork	Tapirus terrestris	-47.7618	-14.1529
Data set from expert consultation and our own fieldwork	Tapirus terrestris	-50.8	1.283
Data set from expert consultation and our own fieldwork	Tapirus terrestris	-58.6167	-15.2819
Data set from expert consultation and our own fieldwork	Tapirus terrestris	-58.0589	-15.3701
Data set from expert consultation and our own fieldwork	Tapirus terrestris	-64.739	-9.35
Data set from expert consultation and our own fieldwork	Tapirus terrestris	-65.344	-9.535
Data set from expert consultation and our own fieldwork	Tapirus terrestris	-67.717	-8.85
Data set from expert consultation and our own fieldwork	Tapirus terrestris	-46.017	-3.75
Data set from expert consultation and our own fieldwork	Tapirus terrestris	-47.9588	-7.92283
Data set from expert consultation and our own fieldwork	Tapirus terrestris	-60	-2.5
Data set from expert consultation and our own fieldwork	Tapirus terrestris	-71.2	1.05
Data set from expert consultation and our own fieldwork	Tapirus terrestris	-69.1	5.09
Data set from expert consultation and our own fieldwork	Tapirus terrestris	-69.1	5.09
Data set from expert consultation and our own fieldwork	Tapirus terrestris	-69.883	-4.3
Data set from expert consultation and our own fieldwork	Tapirus terrestris	-73.95	2.45
Data set from expert consultation and our own fieldwork	Tapirus terrestris	-73.75	2.22
Data set from expert consultation and our own fieldwork	Tapirus terrestris	-72.511	0.25
Data set from expert consultation and our own fieldwork	Tapirus terrestris	-72.508	0.433
Data set from expert consultation and our own fieldwork	Tapirus terrestris	-72.1	-2.089
Data set from expert consultation and our own fieldwork	Tapirus terrestris	-72.04	6.05
Data set from expert consultation and our own fieldwork	Tapirus terrestris	-75.393	1.064
Data set from expert consultation and our own fieldwork	Tapirus terrestris	-69.495	1.042
Data set from expert consultation and our own fieldwork	Tapirus terrestris	-78.233	-3.483
Data set from expert consultation and our own fieldwork	Tapirus terrestris	-76.417	-0.317
Data set from expert consultation and our own fieldwork	Tapirus terrestris	-77.98	-3.06
Data set from expert consultation and our own fieldwork	Tapirus terrestris	-77.35	-2.7
Data set from expert consultation and our own fieldwork	Tapirus terrestris	-76.117	-1.975
Data set from expert consultation and our own fieldwork	Tapirus terrestris	-78.233	-3.483
Data set from expert consultation and our own fieldwork	Tapirus terrestris	-75.891	-0.279
Data set from expert consultation and our own fieldwork	Tapirus terrestris	-78.133	-2.017
Data set from expert consultation and our own fieldwork	Tapirus terrestris	-78.637	-4.446
Data set from expert consultation and our own fieldwork	Tapirus terrestris	-78.038	-2.903
Data set from expert consultation and our own fieldwork	Tapirus terrestris	-75.814	-0.724
Data set from expert consultation and our own fieldwork	Tapirus terrestris	-76.375	-0.674
Data set from expert consultation and our own fieldwork	Tapirus terrestris	-76.91	-0.809
Data set from expert consultation and our own fieldwork	Tapirus terrestris	-57.446	-22.768
Data set from expert consultation and our own fieldwork	Tapirus terrestris	-57.619	-22.098
Data set from expert consultation and our own fieldwork	Tapirus terrestris	-55.967	-23.75
Data set from expert consultation and our own fieldwork	Tapirus terrestris	-56.15	-23.58
Data set from expert consultation and our own fieldwork	Tapirus terrestris	-55.3	-23.62
Data set from expert consultation and our own fieldwork	Tapirus terrestris	-54.58	-23.67
Data set from expert consultation and our own fieldwork	Tapirus terrestris	-59.61	-22.58
Data set from expert consultation and our own fieldwork	Tapirus terrestris	-60.5	-22.55
Data set from expert consultation and our own fieldwork	Tapirus terrestris	-59.165	-22.576
Data set from expert consultation and our own fieldwork	Tapirus terrestris	-59.95	-22.1
Data set from expert consultation and our own fieldwork	Tapirus terrestris	-59.088	-22.546
Data set from expert consultation and our own fieldwork	Tapirus terrestris	-60.34	-21.2
Data set from expert consultation and our own fieldwork	Tapirus terrestris	-58.879	-21.158
Data set from expert consultation and our own fieldwork	Tapirus terrestris	-58.623	-19.809
Data set from expert consultation and our own fieldwork	Tapirus terrestris	-68.882	-12.957
Data set from expert consultation and our own fieldwork	Tapirus terrestris	-68.913	-12.955
Data set from expert consultation and our own fieldwork	Tapirus terrestris	-68.738	-12.658
Data set from expert consultation and our own fieldwork	Tapirus terrestris	-69.28	-12.88
Data set from expert consultation and our own fieldwork	Tapirus terrestris	-70.15	-12.95
Data set from expert consultation and our own fieldwork	Tapirus terrestris	-61.666	4.467
Data set from expert consultation and our own fieldwork	Tapirus terrestris	-65.7	3.7
Data set from expert consultation and our own fieldwork	Tapirus terrestris	-61.6746	3.29395
Data set from expert consultation and our own fieldwork	Tapirus terrestris	-56.3016	-16.5328
Data set from expert consultation and our own fieldwork	Tapirus terrestris	-56.1701	-16.6835
Data set from expert consultation and our own fieldwork	Tapirus terrestris	-56.4812	-16.7076
Data set from expert consultation and our own fieldwork	Tapirus terrestris	-56.1916	-16.9054
Data set from expert consultation and our own fieldwork	Tapirus terrestris	-59.9404	-2.96856
Data set from expert consultation and our own fieldwork	Tapirus terrestris	-76.0133	7.61674
Data set from expert consultation and our own fieldwork	Tapirus terrestris	-76.2037	7.76689
Data set from expert consultation and our own fieldwork	Tapirus terrestris	-71.133	-1.117
Florez FK, Rueda CF, Peñalosa W, et al. 2008	Tapirus terrestris	-74.481	6.92717
